# Supplementary material for: Measurement report: Ammonia in Paris derived from ground-based open-path and satellite observations
Source: Copernicus journal article supplement (doi:10.5194/acp-23-15253-2023), 2023-12-14
Supplement: Supplementary file 1 [file acp-23-15253-2023-supplement.pdf]

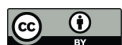

*Supplement of*

## **Measurement report: Ammonia in Paris derived from ground-based open-path and satellite observations**

**Camille Viatte et al.**

*Correspondence to:* Camille Viatte ([camille.viatte@latmos.ipsl.fr](mailto:camille.viatte@latmos.ipsl.fr))

The copyright of individual parts of the supplement might differ from the article licence.

1 **S1: influence of meteorological condition on seasonal and monthly NH<sub>3</sub> variabilities**

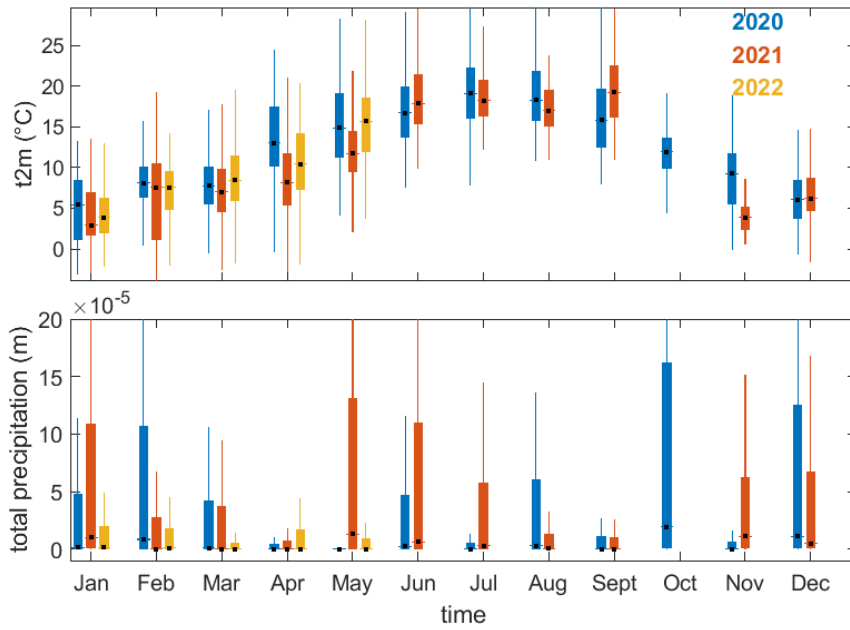

2

3 *Figure S1: Box plot of monthly temperature at 2 meters (t2m, in °C, top panel) and total precipitation*  
4 *(in m, bottom panel) color coded by the year of measurements (2020 in blue, 2021 in orange, and 2022*  
5 *in yellow) derived from ERA-5 around Paris.*

6 **S2: road traffic in Paris**

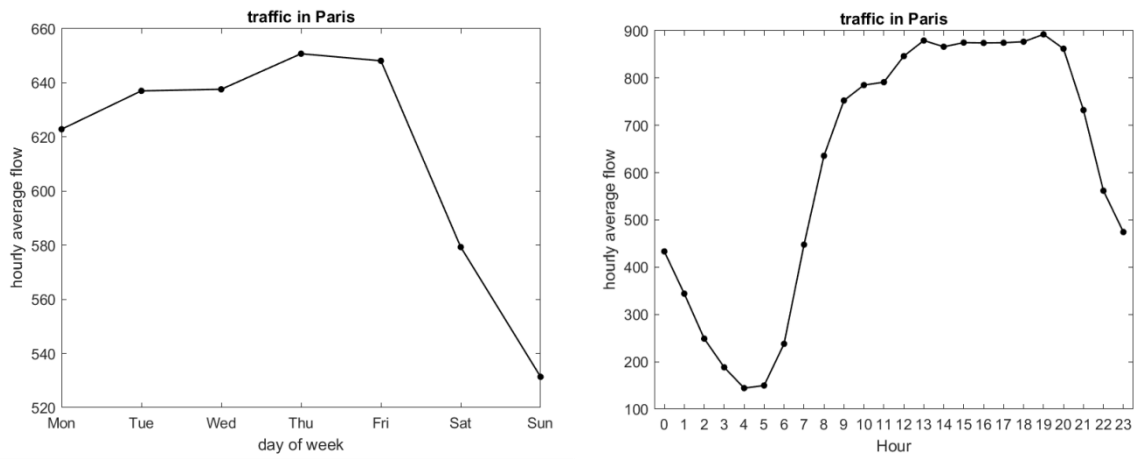

7

8 *Figure S2: weekly (left panel) and diurnal (right panel) cycles of hourly mean flow of vehicles observed*  
9 *in Paris in 2020 and 2021. Source : [https://opendata.paris.fr/explore/dataset/comptages-routiers-](https://opendata.paris.fr/explore/dataset/comptages-routiers-permanents/information/?disjunctive.libelle&disjunctive.etat_trafic&disjunctive.libelle_nd_amont&disjunctive.libelle_nd_aval)*  
10 *permanents/information/?disjunctive.libelle&disjunctive.etat\_trafic&disjunctive.libelle\_nd\_amont&di*  
11 *sjunctive.libelle\_nd\_aval*

12 **S3: PBLH (Planetary Boundary Layer Height) on surface measurements**

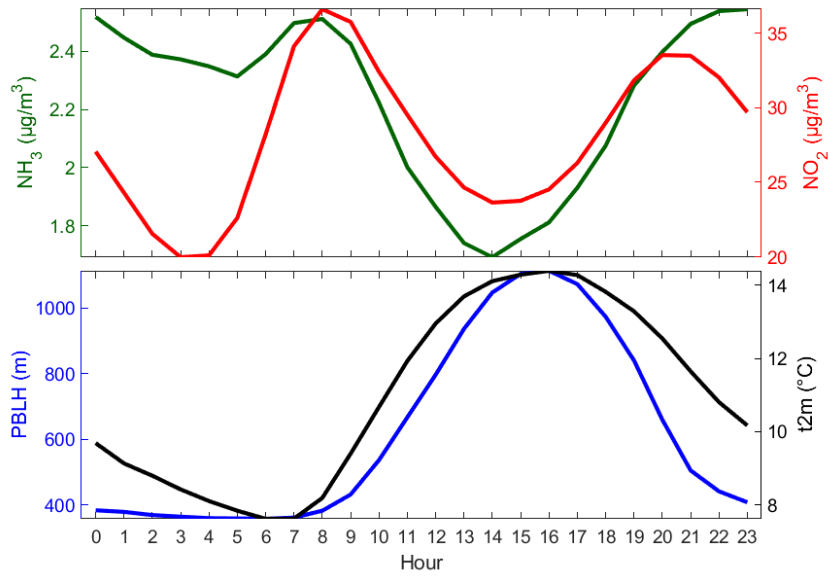

13

14 *Figure S3: mean diurnal cycle of atmospheric  $\text{NH}_3$  and  $\text{NO}_2$  ( $\mu\text{g}\cdot\text{m}^{-3}$ , green and red lines in upper panel)*  
15 *and PBLH (m, in blue, lower panel) and atmospheric temperature ( $^{\circ}\text{C}$ , in black, lower panel) measured*  
16 *in Paris between January 2020 and June 2022.*

17
